# Supplementary material
Source: publisher figshare collection journal article supplement (https://acs.figshare.com/ndownloader/files/4707340)
Supplement: Supplementary file 1 [file 4707340]

## Supporting Information

# **Carbon Nanotubes Contain Residual Metal Catalyst Nanoparticles Even after Washing with Nitric Acid at Elevated Temperature Because These Metal Nanoparticles Are Sheathed by Several Graphene Sheets**

*Martin Pumera\**

*Dr. M. Pumera, ICYS, National Institute for Materials Science, 1-1 Namiki, Tsukuba, Ibaraki, Japan. Phone: +81-29-851-3354-8816; fax: +81-29-860-4706, email: PUMERA.Martin@nims.go.jp*

Figure S1 .....Page S-2

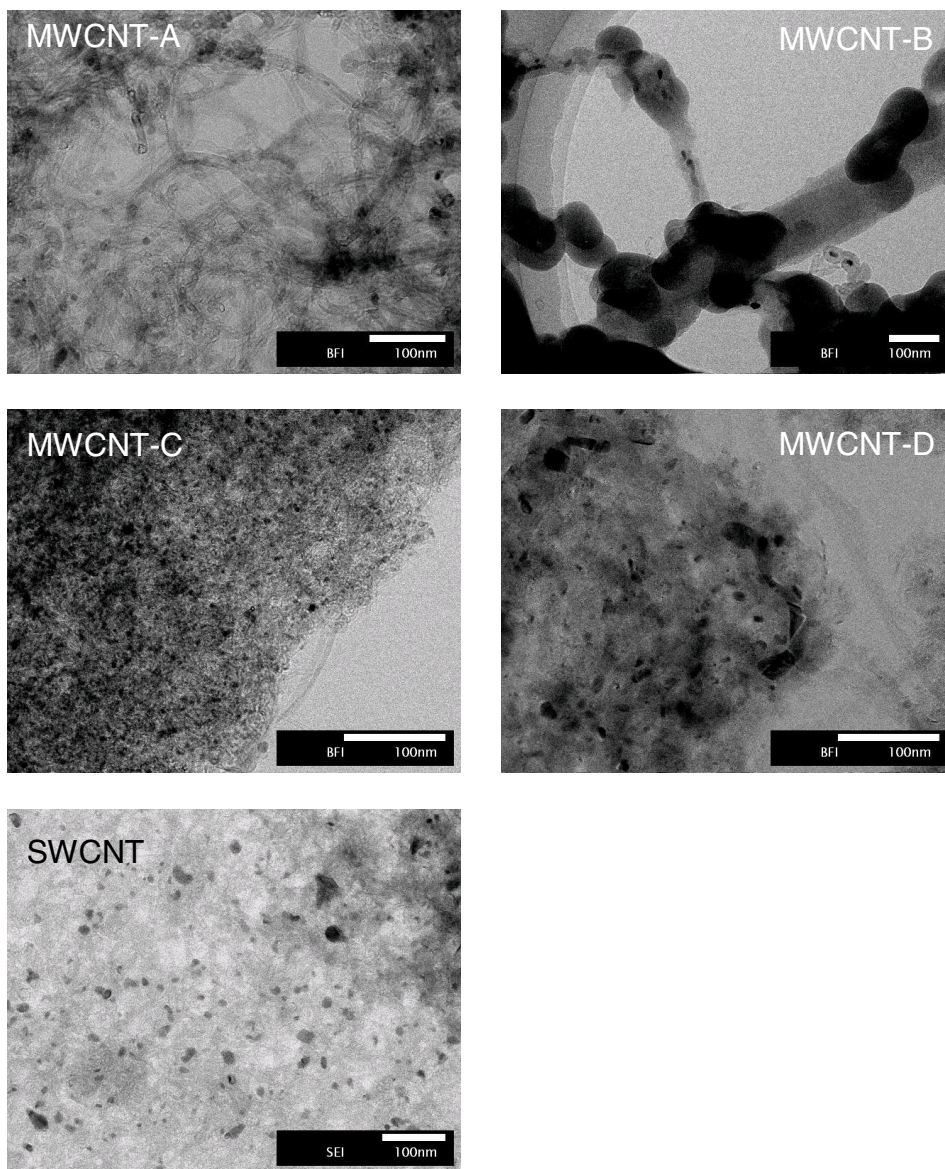

Figure S1. TEM images of as-received multi wall and single wall carbon nanotube materials before ‘washing’ with concentrated nitric acid at 80°C.
